# Supplementary material for: Structural insights into the interaction of human IgG1 with FcγRI: no direct role of glycans in binding
Source: PubMed Central journal article supplement (PMC4631484; doi:10.1107/s1399004715018015), 2015-10-31
Supplement: d-71-02354-sup1.pdf [file d-71-02354-sup1.pdf]

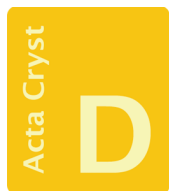

BIOLOGICAL  
CRYSTALLOGRAPHY

**Volume 71 (2015)**

**Supporting information for article:**

**Structural insights into human IgG1 interaction with FcγRI: no direct role of glycans in binding**

**Vaheh Oganesyanyan, Yariv Mazor, Chunying Yang, Kimberly E. Cook, Robert M. Woods, Andrew Ferguson, Michael A. Bowen, Tom Martin, Jie Zhu, Herren Wu and William F. Dall'Acqua**

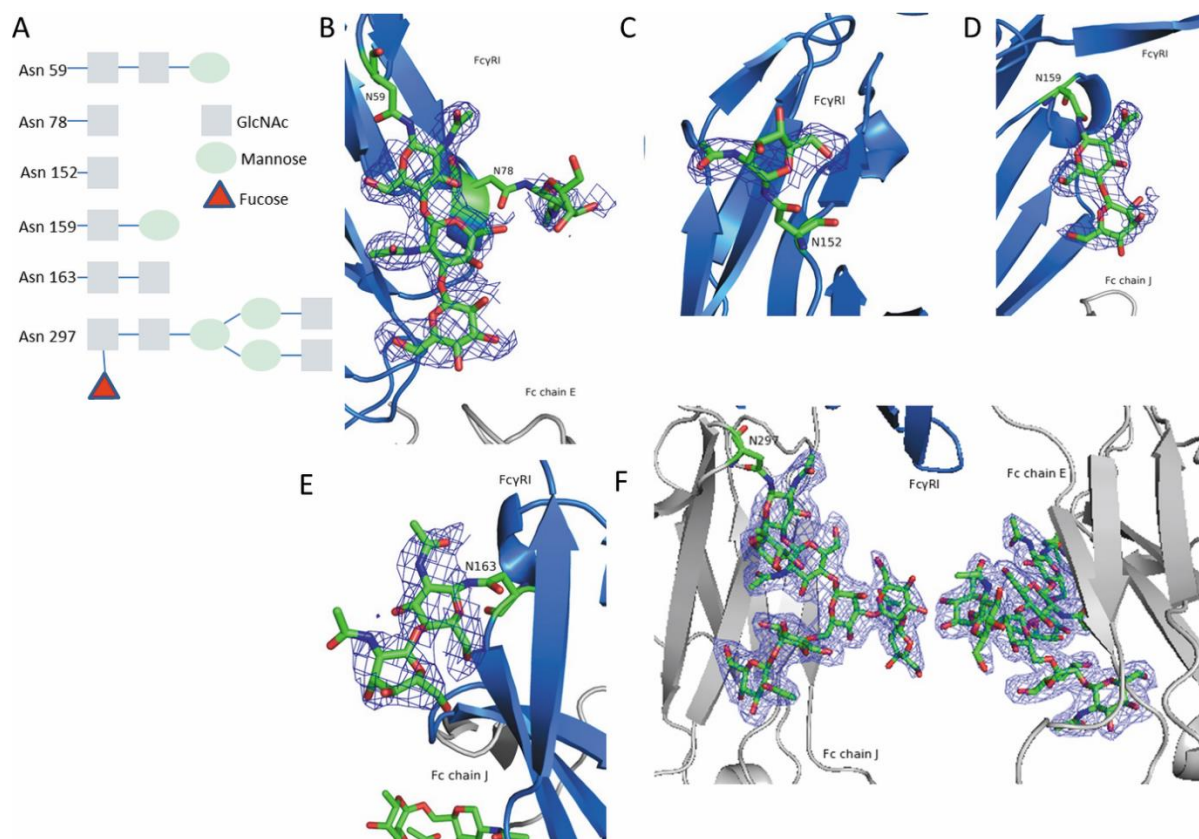

**Figure S1** (A) Schematic representation of N-linked oligosaccharides attached to Fc $\gamma$ RI and Fc, (B) Omit map showing oligosaccharides attached to Fc $\gamma$ RI N59 and N78 in D1. SigmaA weighted  $2mF_o - DF_c$  electron density map allowed the placement of GlcNAc-GlcNAc-Man near N59; however, the quality of that near N78 was considerably lower and only the first GlcNAc was placed, (C) Omit map showing one oligosaccharide attached to Fc $\gamma$ RI N152 in D2. SigmaA weighted  $2mF_o - DF_c$  electron density map allowed the placement of only one GlcNAc, (D) Omit map showing two oligosaccharides attached to Fc $\gamma$ RI N159 in D2. SigmaA weighted  $2mF_o - DF_c$  electron density map allowed the placement of GlcNAc-Man near N159; however, the quality of that around Man was considerably lower than for GlcNAc, (E) Omit map showing two oligosaccharides attached to Fc $\gamma$ RI N163 in D2. SigmaA weighted  $2mF_o - DF_c$  electron density map allowed the placement of GlcNAc-GlcNAc, (F) Omit map showing oligosaccharides attached to both Fc N297. SigmaA weighted  $2mF_o - DF_c$  electron density map allowed the placement of bi-antennary glycans. Terminal galactose and sialic acid residues did not show in the electron density. All electron density maps are shown at  $0.8\sigma$ .

**Table S1** Summary of hydrogen bonds and electrostatic interactions formed between Fc $\gamma$ RI and Fc.

| Fc $\gamma$ RI                     | Distance (Å) | Fc                        |
|------------------------------------|--------------|---------------------------|
| A:LYS 130[N $\zeta$ ] <sup>a</sup> | 3.50         | E:GLU 233[O $\epsilon$ 2] |
| A:LEU 131[N]                       | 2.74         | E:GLU 233[O]              |
| A:LYS 173[N]                       | 2.85         | E:LEU 235[O]              |
| A:HIS 174[N $\epsilon$ 2]          | 3.50         | E:SER 239[O $\gamma$ ]    |
| A:LEU 131[O]                       | 3.07         | E:LEU 235[N]              |
| A:TYR 176[O $\eta$ ]               | 3.47         | E:GLY 237[N]              |
| A:ASN 134[N $\delta$ 2]            | 2.79         | J:GLY 237[O]              |
| A:LYS 145[N $\zeta$ ]              | 3.07         | J:GLU 269[O $\epsilon$ 2] |
| A:HIS 148[N $\epsilon$ 2]          | 3.22         | J:ASP 265[O]              |
| A:ARG 102[N $\eta$ 2]              | 3.46         | E:PRO 329[O]              |
| A:LYS 130[N $\zeta$ ]              | 3.50         | E:233 GLU[O $\epsilon$ 2] |
| A:HIS 148[N $\delta$ 1]            | 3.30         | J:267 SER[O $\gamma$ ]    |

<sup>a</sup>Letters in bracket refer to the corresponding interacting atoms.

**Table S2 Hydrogen bonds between FcyR1 D1 and D2 in unliganded and ligand-bound states.**

| D1            | Hydrogen bond distance (Å)<br>Unliganded | Hydrogen bond distance (Å)<br>Ligand-bound | D2             |
|---------------|------------------------------------------|--------------------------------------------|----------------|
| A:VAL 31[N]   | 2.97                                     | 3.22                                       | A:VAL 109[O]   |
| A:VAL 31[O]   | 3.09                                     | 2.76                                       | A:ARG 112[Nη2] |
| A:SER 32[O]   | 2.90                                     | 2.63                                       | A:GLN 108[Nε2] |
| A:GLU 37[Oε2] | 2.79                                     | 2.70                                       | A:HIS 125[Nε2] |
| A:GLN 97[O]   | 2.79                                     | 2.68                                       | A:ARG 112[Nη2] |
| A:GLU 99[Oε1] | 3.37                                     | 2.95                                       | A:ARG 112[Nη]  |
